# Supplementary material
Source: publisher figshare collection journal article supplement (https://tandf.figshare.com/articles/dataset/_/5899672)

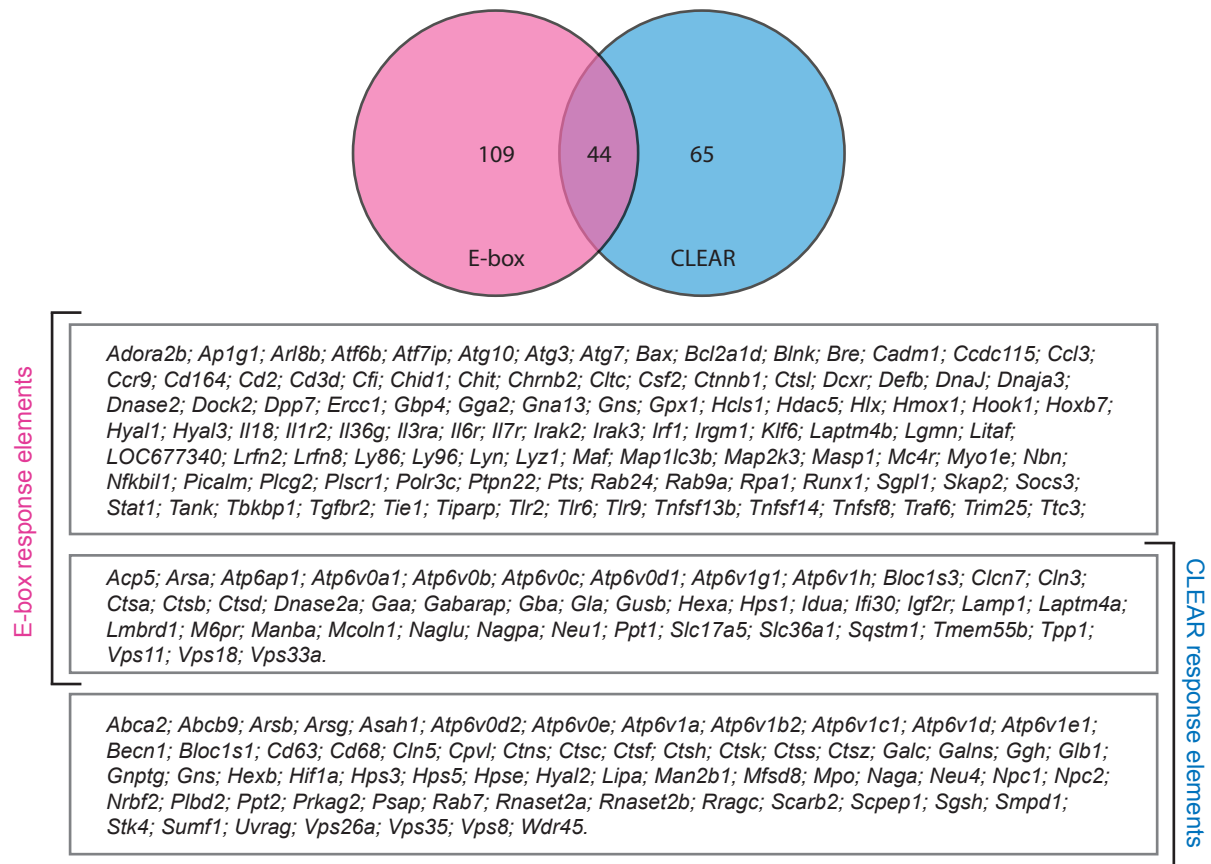

Figure S3

Supplement: Supplementary file 1 [file 1]

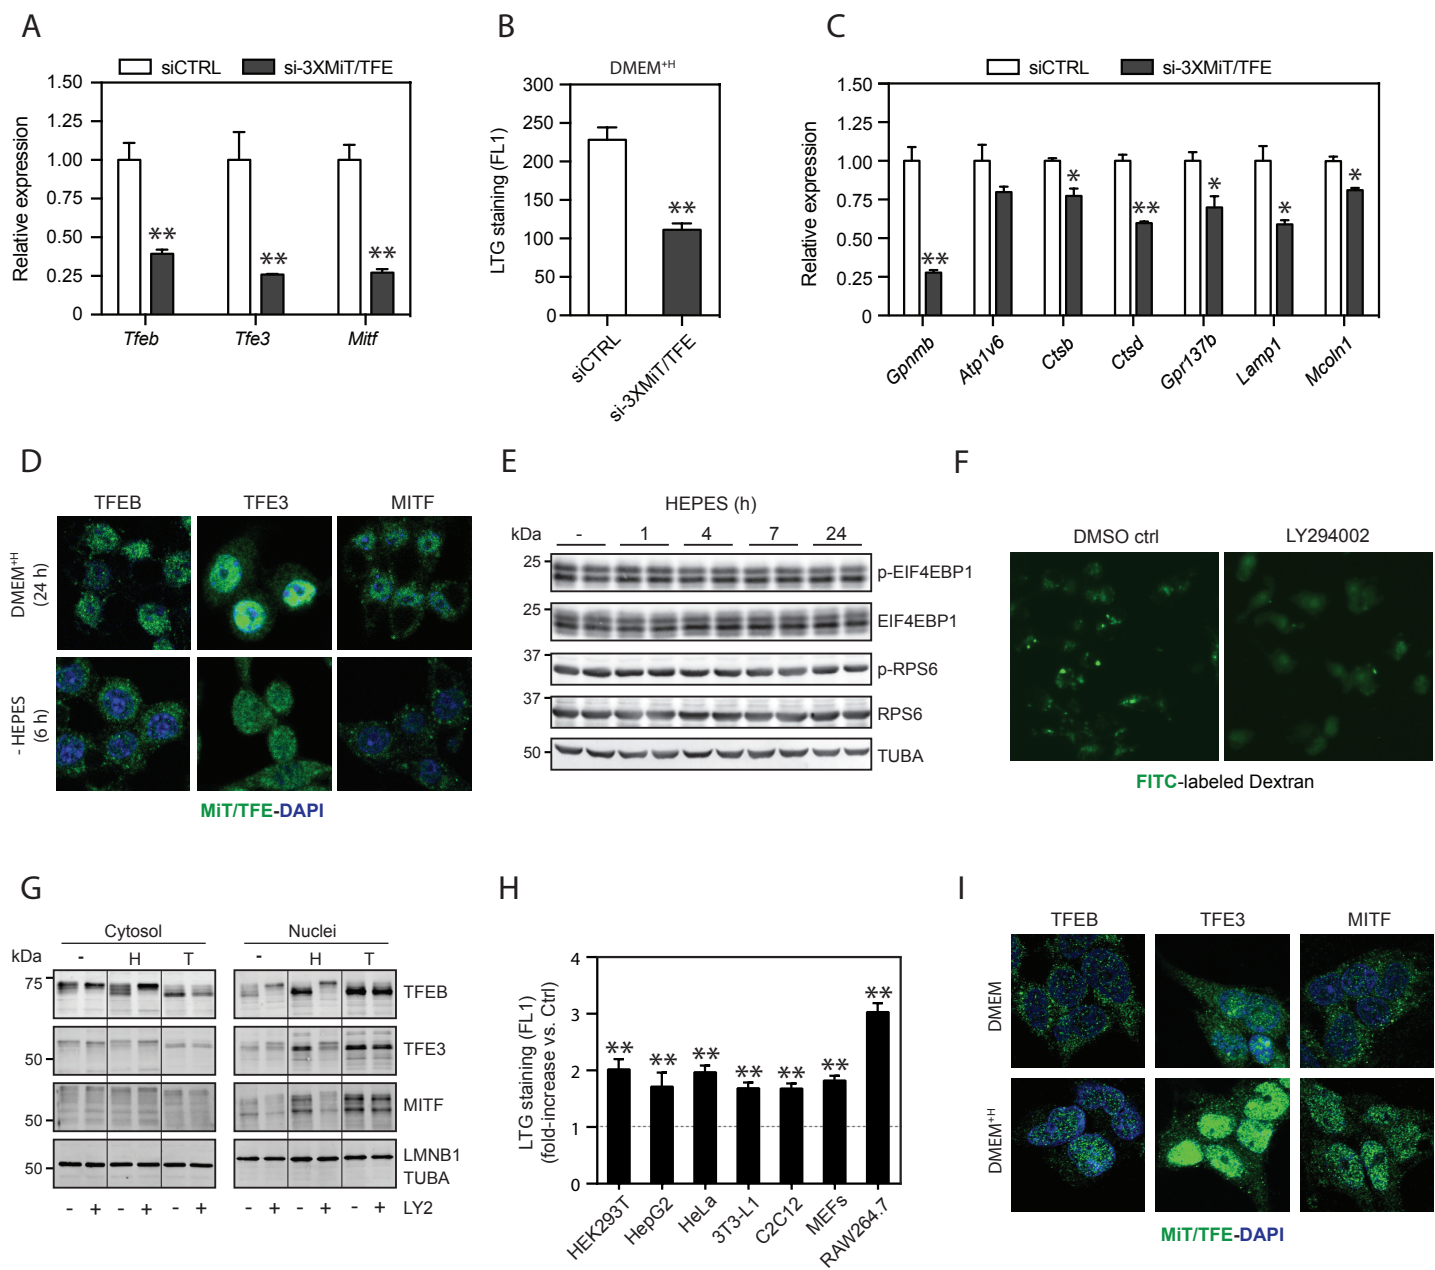

Figure S2

Supplement: Supplementary file 2 [file 1]

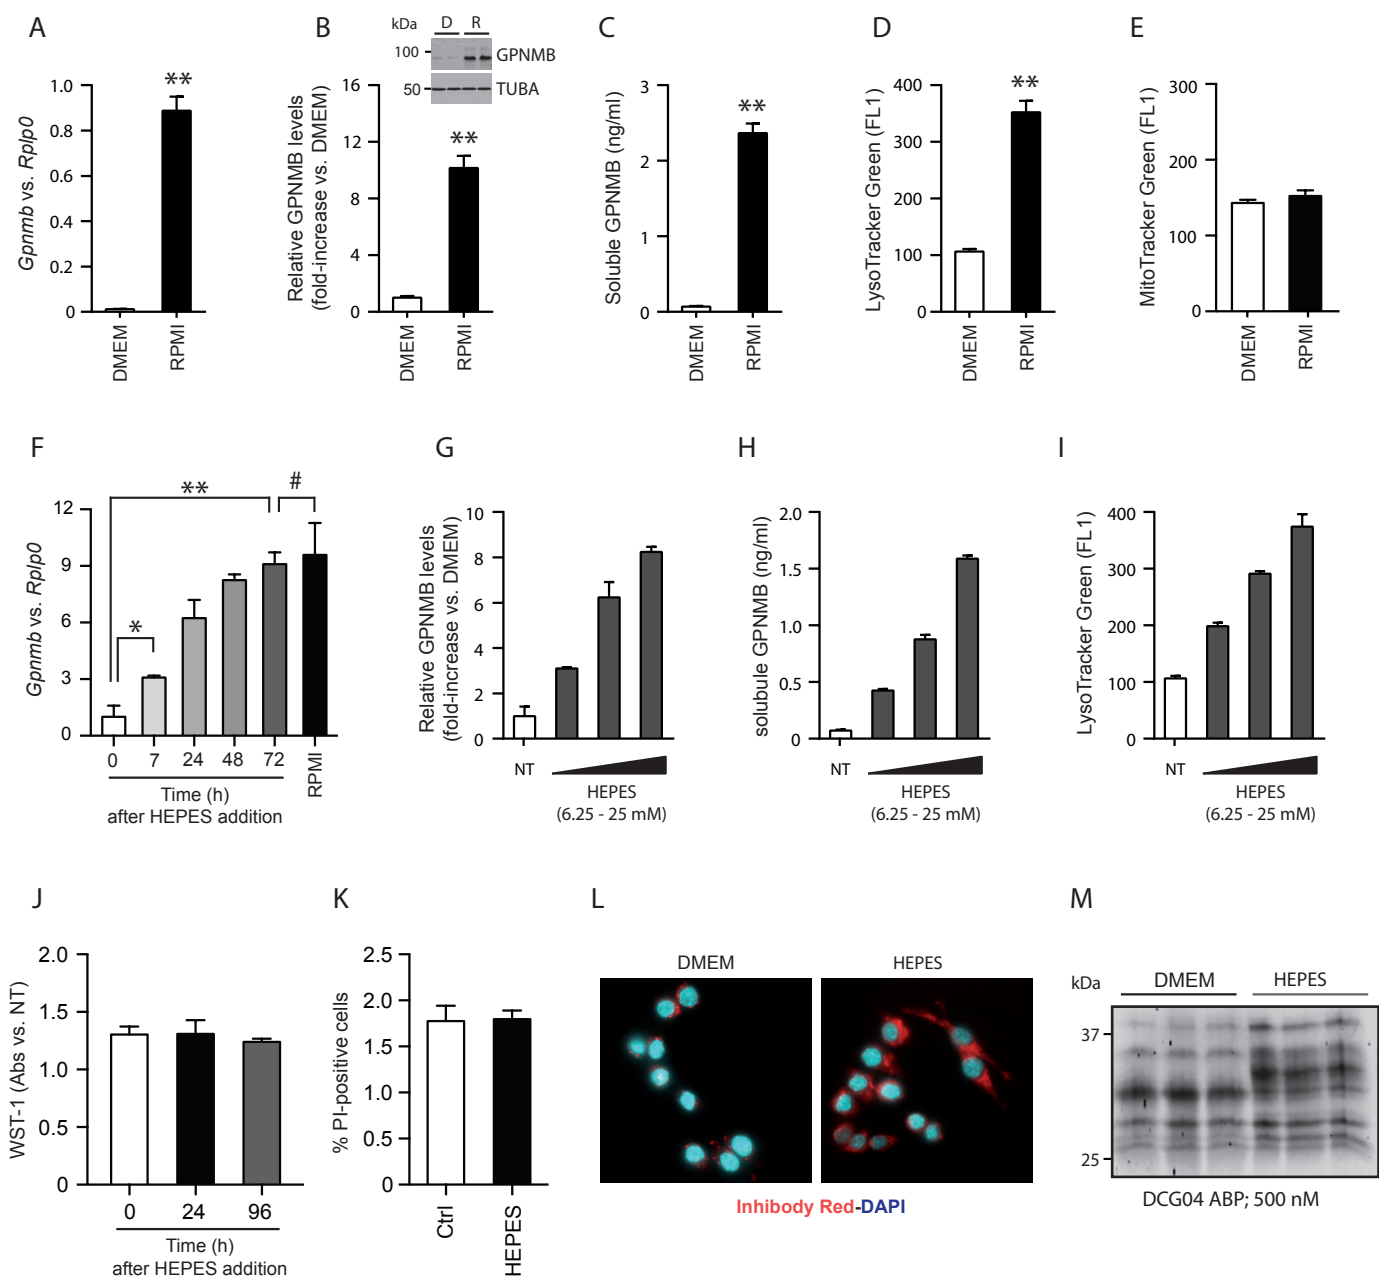

Figure S1

Supplement: Supplementary file 3 [file 1]
